# Supplementary material
Source: publisher figshare collection journal article supplement (https://acs.figshare.com/ndownloader/files/4399816)
Supplement: Supplementary file 1 [file 4399816]

ATOM      1  O5'  DA A   1       0.259  -7.190  -2.577  1.00  0.00
ATOM      2  C5'  DA A   1       1.233  -7.778  -3.422  1.00  0.00
ATOM      3  C4'  DA A   1       2.499  -6.910  -3.585  1.00  0.00
ATOM      4  O4'  DA A   1       2.144  -5.659  -4.176  1.00  0.00
ATOM      5  C1'  DA A   1       2.506  -4.591  -3.317  1.00  0.00
ATOM      6  N9   DA A   1       1.465  -3.544  -3.273  1.00  0.00
ATOM      7  C8   DA A   1       0.119  -3.759  -3.124  1.00  0.00
ATOM      8  N7   DA A   1      -0.549  -2.617  -3.039  1.00  0.00
ATOM      9  C5   DA A   1       0.421  -1.629  -3.169  1.00  0.00
ATOM     10  C6   DA A   1       0.386  -0.230  -3.192  1.00  0.00
ATOM     11  N6   DA A   1      -0.732   0.469  -3.091  1.00  0.00
ATOM     12  N1   DA A   1       1.547   0.448  -3.344  1.00  0.00
ATOM     13  C2   DA A   1       2.704  -0.231  -3.459  1.00  0.00
ATOM     14  N3   DA A   1       2.851  -1.559  -3.457  1.00  0.00
ATOM     15  C4   DA A   1       1.680  -2.212  -3.319  1.00  0.00
ATOM     16  C2'  DA A   1       2.626  -5.228  -1.941  1.00  0.00
ATOM     17  C3'  DA A   1       3.199  -6.590  -2.250  1.00  0.00
ATOM     18  O3'  DA A   1       4.615  -6.533  -2.392  1.00  0.00
ATOM     19  P    DG A   2       5.619  -6.474  -1.107  1.00  0.00
ATOM     20  OP1  DG A   2       6.775  -7.347  -1.408  1.00  0.00
ATOM     21  OP2  DG A   2       4.848  -6.691   0.131  1.00  0.00
ATOM     22  O5'  DG A   2       6.100  -4.929  -1.105  1.00  0.00
ATOM     23  C5'  DG A   2       7.291  -4.498  -1.745  1.00  0.00
ATOM     24  C4'  DG A   2       7.747  -3.108  -1.262  1.00  0.00
ATOM     25  O4'  DG A   2       6.687  -2.181  -1.457  1.00  0.00
ATOM     26  C1'  DG A   2       6.275  -1.641  -0.222  1.00  0.00
ATOM     27  N9   DG A   2       4.806  -1.511  -0.172  1.00  0.00
ATOM     28  C8   DG A   2       3.875  -2.516  -0.053  1.00  0.00
ATOM     29  N7   DG A   2       2.650  -2.038  -0.003  1.00  0.00
ATOM     30  C5   DG A   2       2.793  -0.653  -0.065  1.00  0.00
ATOM     31  C6   DG A   2       1.823   0.361  -0.045  1.00  0.00
ATOM     32  O6   DG A   2       0.591   0.230   0.035  1.00  0.00
ATOM     33  N1   DG A   2       2.343   1.626  -0.147  1.00  0.00
ATOM     34  C2   DG A   2       3.683   1.902  -0.263  1.00  0.00
ATOM     35  N2   DG A   2       3.975   3.189  -0.350  1.00  0.00
ATOM     36  N3   DG A   2       4.630   0.957  -0.281  1.00  0.00
ATOM     37  C4   DG A   2       4.142  -0.310  -0.192  1.00  0.00
ATOM     38  C2'  DG A   2       6.803  -2.592   0.837  1.00  0.00
ATOM     39  C3'  DG A   2       8.113  -3.048   0.229  1.00  0.00
ATOM     40  O3'  DG A   2       9.159  -2.106   0.448  1.00  0.00
ATOM     41  P    DG A   3      10.033  -2.032   1.813  1.00  0.00
ATOM     42  OP1  DG A   3      11.267  -1.281   1.499  1.00  0.00
ATOM     43  OP2  DG A   3      10.132  -3.392   2.394  1.00  0.00
ATOM     44  O5'  DG A   3       9.111  -1.137   2.805  1.00  0.00
ATOM     45  C5'  DG A   3       9.612  -0.144   3.715  1.00  0.00
ATOM     46  C4'  DG A   3       8.881   1.240   3.603  1.00  0.00
ATOM     47  O4'  DG A   3       7.721   1.055   2.792  1.00  0.00
ATOM     48  C1'  DG A   3       6.604   1.324   3.579  1.00  0.00
ATOM     49  N9   DG A   3       5.352   0.610   3.372  1.00  0.00
ATOM     50  C8   DG A   3       5.022  -0.735   3.378  1.00  0.00
ATOM     51  N7   DG A   3       3.700  -0.942   3.336  1.00  0.00
ATOM     52  C5   DG A   3       3.146   0.339   3.285  1.00  0.00
ATOM     53  C6   DG A   3       1.832   0.837   3.213  1.00  0.00
ATOM     54  O6   DG A   3       0.739   0.256   3.185  1.00  0.00
ATOM     55  N1   DG A   3       1.753   2.198   3.225  1.00  0.00
ATOM     56  C2   DG A   3       2.813   3.043   3.267  1.00  0.00
ATOM     57  N2   DG A   3       2.561   4.339   3.284  1.00  0.00
ATOM     58  N3   DG A   3       4.048   2.598   3.276  1.00  0.00
ATOM     59  C4   DG A   3       4.175   1.276   3.308  1.00  0.00
ATOM     60  C2'  DG A   3       7.039   1.027   4.995  1.00  0.00
ATOM     61  C3'  DG A   3       8.341   1.773   4.989  1.00  0.00
ATOM     62  O3'  DG A   3       8.064   3.189   5.096  1.00  0.00
ATOM     63  P    DA A   4       7.481   3.901   6.476  1.00  0.00
ATOM     64  OP1  DA A   4       8.458   4.946   6.848  1.00  0.00
ATOM     65  OP2  DA A   4       7.164   2.839   7.453  1.00  0.00
ATOM     66  O5'  DA A   4       6.060   4.682   6.155  1.00  0.00
ATOM     67  C5'  DA A   4       5.282   5.255   7.221  1.00  0.00
ATOM     68  C4'  DA A   4       4.155   6.286   6.848  1.00  0.00
ATOM     69  O4'  DA A   4       3.099   5.626   6.147  1.00  0.00
ATOM     70  C1'  DA A   4       1.905   5.604   6.921  1.00  0.00
ATOM     71  N9   DA A   4       1.279   4.273   6.873  1.00  0.00
ATOM     72  C8   DA A   4       1.960   3.100   7.065  1.00  0.00
ATOM     73  N7   DA A   4       1.158   2.050   6.976  1.00  0.00
ATOM     74  C5   DA A   4      -0.095   2.586   6.689  1.00  0.00
ATOM     75  C6   DA A   4      -1.357   2.029   6.461  1.00  0.00
ATOM     76  N6   DA A   4      -1.586   0.728   6.452  1.00  0.00
ATOM     77  N1   DA A   4      -2.396   2.859   6.205  1.00  0.00
ATOM     78  C2   DA A   4      -2.198   4.191   6.190  1.00  0.00
ATOM     79  N3   DA A   4      -1.040   4.824   6.395  1.00  0.00
ATOM     80  C4   DA A   4      -0.018   3.979   6.636  1.00  0.00
ATOM     81  C2'  DA A   4       2.369   5.895   8.341  1.00  0.00
ATOM     82  C3'  DA A   4       3.454   6.917   8.096  1.00  0.00
ATOM     83  O3'  DA A   4       2.866   8.203   7.854  1.00  0.00
ATOM     84  P    DG A   5       2.150   9.094   9.034  1.00  0.00
ATOM     85  OP1  DG A   5       2.487  10.510   8.775  1.00  0.00
ATOM     86  OP2  DG A   5       2.486   8.505  10.350  1.00  0.00
ATOM     87  O5'  DG A   5       0.538   8.904   8.840  1.00  0.00
ATOM     88  C5'  DG A   5      -0.319   9.970   8.424  1.00  0.00
ATOM     89  C4'  DG A   5      -1.818   9.807   8.795  1.00  0.00
ATOM     90  O4'  DG A   5      -2.242   8.493   8.462  1.00  0.00
ATOM     91  C1'  DG A   5      -2.704   7.834   9.623  1.00  0.00
ATOM     92  N9   DG A   5      -2.286   6.424   9.640  1.00  0.00
ATOM     93  C8   DG A   5      -1.031   5.931   9.902  1.00  0.00
ATOM     94  N7   DG A   5      -1.014   4.617   9.898  1.00  0.00
ATOM     95  C5   DG A   5      -2.323   4.234   9.607  1.00  0.00
ATOM     96  C6   DG A   5      -2.885   2.955   9.473  1.00  0.00
ATOM     97  O6   DG A   5      -2.312   1.859   9.586  1.00  0.00
ATOM     98  N1   DG A   5      -4.226   2.968   9.178  1.00  0.00
ATOM     99  C2   DG A   5      -4.970   4.111   9.022  1.00  0.00
ATOM    100  N2   DG A   5      -6.247   3.904   8.748  1.00  0.00
ATOM    101  N3   DG A   5      -4.462   5.342   9.156  1.00  0.00
ATOM    102  C4   DG A   5      -3.131   5.361   9.438  1.00  0.00
ATOM    103  C2'  DG A   5      -2.108   8.604  10.798  1.00  0.00
ATOM    104  C3'  DG A   5      -2.174  10.021  10.291  1.00  0.00
ATOM    105  O3'  DG A   5      -3.497  10.542  10.449  1.00  0.00
ATOM    106  P    DG A   6      -4.017  11.292  11.801  1.00  0.00
ATOM    107  OP1  DG A   6      -4.848  12.435  11.361  1.00  0.00
ATOM    108  OP2  DG A   6      -2.854  11.550  12.682  1.00  0.00
ATOM    109  O5'  DG A   6      -4.979  10.206  12.565  1.00  0.00
ATOM    110  C5'  DG A   6      -6.407  10.222  12.460  1.00  0.00
ATOM    111  C4'  DG A   6      -7.100   8.832  12.593  1.00  0.00
ATOM    112  O4'  DG A   6      -6.249   7.870  11.970  1.00  0.00
ATOM    113  C1'  DG A   6      -6.077   6.835  12.894  1.00  0.00
ATOM    114  N9   DG A   6      -4.934   5.931  12.826  1.00  0.00
ATOM    115  C8   DG A   6      -3.582   6.125  13.038  1.00  0.00
ATOM    116  N7   DG A   6      -2.886   4.982  13.030  1.00  0.00
ATOM    117  C5   DG A   6      -3.840   3.992  12.781  1.00  0.00
ATOM    118  C6   DG A   6      -3.788   2.594  12.637  1.00  0.00
ATOM    119  O6   DG A   6      -2.837   1.802  12.704  1.00  0.00
ATOM    120  N1   DG A   6      -5.004   2.012  12.439  1.00  0.00
ATOM    121  C2   DG A   6      -6.187   2.673  12.355  1.00  0.00
ATOM    122  N2   DG A   6      -7.275   1.952  12.163  1.00  0.00
ATOM    123  N3   DG A   6      -6.271   3.977  12.450  1.00  0.00
ATOM    124  C4   DG A   6      -5.096   4.590  12.665  1.00  0.00
ATOM    125  C2'  DG A   6      -6.099   7.525  14.236  1.00  0.00
ATOM    126  C3'  DG A   6      -7.391   8.286  14.056  1.00  0.00
ATOM    127  O3'  DG A   6      -8.546   7.405  14.119  1.00  0.00
ATOM    128  P    DA A   7      -9.019   6.546  15.460  1.00  0.00
ATOM    129  OP1  DA A   7     -10.306   7.125  15.899  1.00  0.00
ATOM    130  OP2  DA A   7      -7.901   6.511  16.428  1.00  0.00
ATOM    131  O5'  DA A   7      -9.316   4.976  15.017  1.00  0.00
ATOM    132  C5'  DA A   7      -9.642   3.975  16.006  1.00  0.00
ATOM    133  C4'  DA A   7     -10.130   2.565  15.489  1.00  0.00
ATOM    134  O4'  DA A   7      -9.056   1.860  14.868  1.00  0.00
ATOM    135  C1'  DA A   7      -8.699   0.689  15.604  1.00  0.00
ATOM    136  N9   DA A   7      -7.235   0.584  15.729  1.00  0.00
ATOM    137  C8   DA A   7      -6.447   1.641  16.104  1.00  0.00
ATOM    138  N7   DA A   7      -5.170   1.297  16.169  1.00  0.00
ATOM    139  C5   DA A   7      -5.145  -0.045  15.802  1.00  0.00
ATOM    140  C6   DA A   7      -4.125  -0.991  15.661  1.00  0.00
ATOM    141  N6   DA A   7      -2.846  -0.715  15.852  1.00  0.00
ATOM    142  N1   DA A   7      -4.453  -2.248  15.292  1.00  0.00
ATOM    143  C2   DA A   7      -5.745  -2.563  15.064  1.00  0.00
ATOM    144  N3   DA A   7      -6.792  -1.742  15.169  1.00  0.00
ATOM    145  C4   DA A   7      -6.440  -0.493  15.530  1.00  0.00
ATOM    146  C2'  DA A   7      -9.296   0.925  16.983  1.00  0.00
ATOM    147  C3'  DA A   7     -10.599   1.609  16.637  1.00  0.00
ATOM    148  O3'  DA A   7     -11.569   0.629  16.245  1.00  0.00
ATOM    149  P    DG A   8     -12.261  -0.416  17.309  1.00  0.00
ATOM    150  OP1  DG A   8     -13.671  -0.594  16.902  1.00  0.00
ATOM    151  OP2  DG A   8     -11.968   0.039  18.685  1.00  0.00
ATOM    152  O5'  DG A   8     -11.477  -1.837  17.109  1.00  0.00
ATOM    153  C5'  DG A   8     -12.084  -2.971  16.490  1.00  0.00
ATOM    154  C4'  DG A   8     -11.431  -4.342  16.814  1.00  0.00
ATOM    155  O4'  DG A   8     -10.020  -4.251  16.668  1.00  0.00
ATOM    156  C1'  DG A   8      -9.380  -4.580  17.884  1.00  0.00
ATOM    157  N9   DG A   8      -8.240  -3.683  18.135  1.00  0.00
ATOM    158  C8   DG A   8      -8.303  -2.352  18.470  1.00  0.00
ATOM    159  N7   DG A   8      -7.105  -1.843  18.663  1.00  0.00
ATOM    160  C5   DG A   8      -6.218  -2.894  18.434  1.00  0.00
ATOM    161  C6   DG A   8      -4.817  -2.927  18.498  1.00  0.00
ATOM    162  O6   DG A   8      -4.049  -1.993  18.777  1.00  0.00
ATOM    163  N1   DG A   8      -4.279  -4.155  18.202  1.00  0.00
ATOM    164  C2   DG A   8      -5.020  -5.262  17.875  1.00  0.00
ATOM    165  N2   DG A   8      -4.308  -6.350  17.627  1.00  0.00
ATOM    166  N3   DG A   8      -6.358  -5.262  17.819  1.00  0.00
ATOM    167  C4   DG A   8      -6.918  -4.055  18.104  1.00  0.00
ATOM    168  C2'  DG A   8     -10.452  -4.420  18.959  1.00  0.00
ATOM    169  C3'  DG A   8     -11.690  -4.901  18.238  1.00  0.00
ATOM    170  O3'  DG A   8     -11.758  -6.329  18.224  1.00  0.00
ATOM    171  P    DG A   9     -12.334  -7.227  19.454  1.00  0.00
ATOM    172  OP1  DG A   9     -12.631  -8.570  18.905  1.00  0.00
ATOM    173  OP2  DG A   9     -13.409  -6.462  20.126  1.00  0.00
ATOM    174  O5'  DG A   9     -11.090  -7.352  20.500  1.00  0.00
ATOM    175  C5'  DG A   9     -10.763  -8.534  21.252  1.00  0.00
ATOM    176  C4'  DG A   9      -9.286  -9.037  21.049  1.00  0.00
ATOM    177  O4'  DG A   9      -8.570  -7.979  20.420  1.00  0.00
ATOM    178  C1'  DG A   9      -7.593  -7.538  21.307  1.00  0.00
ATOM    179  N9   DG A   9      -7.229  -6.133  21.358  1.00  0.00
ATOM    180  C8   DG A   9      -7.955  -4.968  21.539  1.00  0.00
ATOM    181  N7   DG A   9      -7.172  -3.894  21.702  1.00  0.00
ATOM    182  C5   DG A   9      -5.871  -4.390  21.609  1.00  0.00
ATOM    183  C6   DG A   9      -4.591  -3.811  21.678  1.00  0.00
ATOM    184  O6   DG A   9      -4.234  -2.637  21.859  1.00  0.00
ATOM    185  N1   DG A   9      -3.569  -4.705  21.579  1.00  0.00
ATOM    186  C2   DG A   9      -3.714  -6.040  21.385  1.00  0.00
ATOM    187  N2   DG A   9      -2.616  -6.769  21.316  1.00  0.00
ATOM    188  N3   DG A   9      -4.897  -6.593  21.260  1.00  0.00
ATOM    189  C4   DG A   9      -5.927  -5.765  21.399  1.00  0.00
ATOM    190  C2'  DG A   9      -8.099  -7.897  22.686  1.00  0.00
ATOM    191  C3'  DG A   9      -8.504  -9.311  22.411  1.00  0.00
ATOM    192  O3'  DG A   9      -7.302 -10.119  22.332  1.00  0.00
ATOM    193  P    DA A  10      -6.296 -10.431  23.620  1.00  0.00
ATOM    194  OP1  DA A  10      -6.076 -11.896  23.611  1.00  0.00
ATOM    195  OP2  DA A  10      -6.877  -9.811  24.832  1.00  0.00
ATOM    196  O5'  DA A  10      -4.815  -9.700  23.421  1.00  0.00
ATOM    197  C5'  DA A  10      -3.577 -10.437  23.374  1.00  0.00
ATOM    198  C4'  DA A  10      -2.231  -9.775  23.869  1.00  0.00
ATOM    199  O4'  DA A  10      -2.124  -8.366  23.709  1.00  0.00
ATOM    200  C1'  DA A  10      -1.405  -7.800  24.801  1.00  0.00
ATOM    201  N9   DA A  10      -1.880  -6.427  25.033  1.00  0.00
ATOM    202  C8   DA A  10      -3.197  -6.115  25.243  1.00  0.00
ATOM    203  N7   DA A  10      -3.378  -4.809  25.366  1.00  0.00
ATOM    204  C5   DA A  10      -2.108  -4.261  25.209  1.00  0.00
ATOM    205  C6   DA A  10      -1.609  -2.955  25.214  1.00  0.00
ATOM    206  N6   DA A  10      -2.373  -1.886  25.353  1.00  0.00
ATOM    207  N1   DA A  10      -0.282  -2.766  25.033  1.00  0.00
ATOM    208  C2   DA A  10       0.527  -3.830  24.862  1.00  0.00
ATOM    209  N3   DA A  10       0.157  -5.113  24.842  1.00  0.00
ATOM    210  C4   DA A  10      -1.169  -5.277  25.009  1.00  0.00
ATOM    211  C2'  DA A  10      -1.782  -8.703  25.961  1.00  0.00
ATOM    212  C3'  DA A  10      -1.730 -10.081  25.317  1.00  0.00
ATOM    213  O3'  DA A  10      -0.385 -10.576  25.281  1.00  0.00
ATOM    214  P    DG A  11       0.514 -10.875  26.615  1.00  0.00
ATOM    215  OP1  DG A  11       1.324 -12.081  26.339  1.00  0.00
ATOM    216  OP2  DG A  11      -0.367 -10.857  27.803  1.00  0.00
ATOM    217  O5'  DG A  11       1.499  -9.582  26.724  1.00  0.00
ATOM    218  C5'  DG A  11       2.700  -9.483  25.967  1.00  0.00
ATOM    219  C4'  DG A  11       3.767  -8.551  26.588  1.00  0.00
ATOM    220  O4'  DG A  11       3.316  -7.204  26.582  1.00  0.00
ATOM    221  C1'  DG A  11       3.313  -6.657  27.885  1.00  0.00
ATOM    222  N9   DG A  11       2.063  -5.899  28.058  1.00  0.00
ATOM    223  C8   DG A  11       0.822  -6.472  28.195  1.00  0.00
ATOM    224  N7   DG A  11      -0.123  -5.569  28.310  1.00  0.00
ATOM    225  C5   DG A  11       0.534  -4.340  28.252  1.00  0.00
ATOM    226  C6   DG A  11       0.023  -3.034  28.311  1.00  0.00
ATOM    227  O6   DG A  11      -1.162  -2.690  28.446  1.00  0.00
ATOM    228  N1   DG A  11       0.984  -2.060  28.209  1.00  0.00
ATOM    229  C2   DG A  11       2.324  -2.311  28.060  1.00  0.00
ATOM    230  N2   DG A  11       3.083  -1.229  27.974  1.00  0.00
ATOM    231  N3   DG A  11       2.839  -3.545  27.989  1.00  0.00
ATOM    232  C4   DG A  11       1.909  -4.533  28.096  1.00  0.00
ATOM    233  C2'  DG A  11       3.358  -7.859  28.836  1.00  0.00
ATOM    234  C3'  DG A  11       4.146  -8.884  28.042  1.00  0.00
ATOM    235  O3'  DG A  11       5.544  -8.729  28.217  1.00  0.00
ATOM    236  P    DG A  12       6.310  -9.140  29.587  1.00  0.00
ATOM    237  OP1  DG A  12       7.705  -9.480  29.236  1.00  0.00
ATOM    238  OP2  DG A  12       5.492 -10.113  30.348  1.00  0.00
ATOM    239  O5'  DG A  12       6.309  -7.742  30.403  1.00  0.00
ATOM    240  C5'  DG A  12       7.110  -6.648  29.986  1.00  0.00
ATOM    241  C4'  DG A  12       6.770  -5.343  30.723  1.00  0.00
ATOM    242  O4'  DG A  12       5.445  -4.902  30.471  1.00  0.00
ATOM    243  C1'  DG A  12       4.951  -4.226  31.607  1.00  0.00
ATOM    244  N9   DG A  12       3.473  -4.240  31.618  1.00  0.00
ATOM    245  C8   DG A  12       2.649  -5.349  31.627  1.00  0.00
ATOM    246  N7   DG A  12       1.350  -5.037  31.627  1.00  0.00
ATOM    247  C5   DG A  12       1.324  -3.641  31.609  1.00  0.00
ATOM    248  C6   DG A  12       0.298  -2.679  31.599  1.00  0.00
ATOM    249  O6   DG A  12      -0.936  -2.800  31.591  1.00  0.00
ATOM    250  N1   DG A  12       0.745  -1.391  31.622  1.00  0.00
ATOM    251  C2   DG A  12       2.049  -1.013  31.643  1.00  0.00
ATOM    252  N2   DG A  12       2.306   0.280  31.684  1.00  0.00
ATOM    253  N3   DG A  12       3.033  -1.879  31.636  1.00  0.00
ATOM    254  C4   DG A  12       2.637  -3.161  31.617  1.00  0.00
ATOM    255  C2'  DG A  12       5.533  -5.019  32.766  1.00  0.00
ATOM    256  C3'  DG A  12       6.911  -5.421  32.260  1.00  0.00
ATOM    257  O3'  DG A  12       7.903  -4.520  32.708  1.00  0.00
TER     258       DG A  12 
ATOM    259  O5'  DC B  13      -4.688   7.093  31.334  1.00  0.00
ATOM    260  C5'  DC B  13      -3.956   6.429  30.327  1.00  0.00
ATOM    261  C4'  DC B  13      -2.506   6.188  30.772  1.00  0.00
ATOM    262  O4'  DC B  13      -2.376   5.345  31.907  1.00  0.00
ATOM    263  C1'  DC B  13      -1.290   4.439  31.744  1.00  0.00
ATOM    264  N1   DC B  13      -1.741   3.035  31.545  1.00  0.00
ATOM    265  C2   DC B  13      -0.856   1.992  31.871  1.00  0.00
ATOM    266  O2   DC B  13       0.303   2.220  32.262  1.00  0.00
ATOM    267  N3   DC B  13      -1.319   0.723  31.741  1.00  0.00
ATOM    268  C4   DC B  13      -2.578   0.477  31.312  1.00  0.00
ATOM    269  N4   DC B  13      -2.925  -0.806  31.218  1.00  0.00
ATOM    270  C5   DC B  13      -3.489   1.508  30.946  1.00  0.00
ATOM    271  C6   DC B  13      -3.017   2.779  31.073  1.00  0.00
ATOM    272  C2'  DC B  13      -0.531   4.925  30.526  1.00  0.00
ATOM    273  C3'  DC B  13      -1.659   5.499  29.700  1.00  0.00
ATOM    274  O3'  DC B  13      -1.216   6.264  28.585  1.00  0.00
ATOM    275  P    DC B  14      -0.726   7.797  28.683  1.00  0.00
ATOM    276  OP1  DC B  14       0.114   7.973  29.892  1.00  0.00
ATOM    277  OP2  DC B  14      -1.928   8.637  28.512  1.00  0.00
ATOM    278  O5'  DC B  14       0.232   8.039  27.395  1.00  0.00
ATOM    279  C5'  DC B  14       0.965   7.020  26.722  1.00  0.00
ATOM    280  C4'  DC B  14       2.069   6.363  27.581  1.00  0.00
ATOM    281  O4'  DC B  14       1.448   5.380  28.401  1.00  0.00
ATOM    282  C1'  DC B  14       1.913   4.093  28.059  1.00  0.00
ATOM    283  N1   DC B  14       0.880   3.025  28.046  1.00  0.00
ATOM    284  C2   DC B  14       1.292   1.733  28.382  1.00  0.00
ATOM    285  O2   DC B  14       2.472   1.563  28.756  1.00  0.00
ATOM    286  N3   DC B  14       0.363   0.724  28.338  1.00  0.00
ATOM    287  C4   DC B  14      -0.924   1.002  27.970  1.00  0.00
ATOM    288  N4   DC B  14      -1.832   0.042  27.916  1.00  0.00
ATOM    289  C5   DC B  14      -1.345   2.287  27.611  1.00  0.00
ATOM    290  C6   DC B  14      -0.413   3.274  27.652  1.00  0.00
ATOM    291  C2'  DC B  14       2.464   4.251  26.657  1.00  0.00
ATOM    292  C3'  DC B  14       3.115   5.604  26.733  1.00  0.00
ATOM    293  O3'  DC B  14       4.383   5.518  27.384  1.00  0.00
ATOM    294  P    DT B  15       5.745   5.155  26.567  1.00  0.00
ATOM    295  OP1  DT B  15       6.880   5.290  27.505  1.00  0.00
ATOM    296  OP2  DT B  15       5.743   5.943  25.314  1.00  0.00
ATOM    297  O5'  DT B  15       5.620   3.595  26.130  1.00  0.00
ATOM    298  C5'  DT B  15       6.579   2.605  26.499  1.00  0.00
ATOM    299  C4'  DT B  15       6.289   1.213  25.878  1.00  0.00
ATOM    300  O4'  DT B  15       4.901   0.961  26.049  1.00  0.00
ATOM    301  C1'  DT B  15       4.334   0.791  24.778  1.00  0.00
ATOM    302  N1   DT B  15       2.881   0.987  24.695  1.00  0.00
ATOM    303  C2   DT B  15       2.159  -0.179  24.866  1.00  0.00
ATOM    304  O2   DT B  15       2.656  -1.272  25.159  1.00  0.00
ATOM    305  N3   DT B  15       0.796  -0.093  24.689  1.00  0.00
ATOM    306  C4   DT B  15       0.087   1.053  24.366  1.00  0.00
ATOM    307  O4   DT B  15      -1.151   0.998  24.286  1.00  0.00
ATOM    308  C5   DT B  15       0.879   2.237  24.191  1.00  0.00
ATOM    309  C7   DT B  15       0.289   3.562  23.840  1.00  0.00
ATOM    310  C6   DT B  15       2.246   2.167  24.346  1.00  0.00
ATOM    311  C2'  DT B  15       5.189   1.537  23.790  1.00  0.00
ATOM    312  C3'  DT B  15       6.537   1.100  24.343  1.00  0.00
ATOM    313  O3'  DT B  15       6.978  -0.165  23.780  1.00  0.00
ATOM    314  P    DC B  16       6.596  -1.723  24.209  1.00  0.00
ATOM    315  OP1  DC B  16       6.104  -1.747  25.607  1.00  0.00
ATOM    316  OP2  DC B  16       7.763  -2.561  23.863  1.00  0.00
ATOM    317  O5'  DC B  16       5.323  -2.200  23.280  1.00  0.00
ATOM    318  C5'  DC B  16       5.430  -2.971  22.070  1.00  0.00
ATOM    319  C4'  DC B  16       4.900  -4.445  22.168  1.00  0.00
ATOM    320  O4'  DC B  16       3.549  -4.489  22.621  1.00  0.00
ATOM    321  C1'  DC B  16       2.651  -4.973  21.627  1.00  0.00
ATOM    322  N1   DC B  16       1.469  -4.079  21.590  1.00  0.00
ATOM    323  C2   DC B  16       0.167  -4.551  21.845  1.00  0.00
ATOM    324  O2   DC B  16      -0.059  -5.756  22.055  1.00  0.00
ATOM    325  N3   DC B  16      -0.831  -3.630  21.857  1.00  0.00
ATOM    326  C4   DC B  16      -0.579  -2.320  21.625  1.00  0.00
ATOM    327  N4   DC B  16      -1.635  -1.508  21.664  1.00  0.00
ATOM    328  C5   DC B  16       0.719  -1.819  21.339  1.00  0.00
ATOM    329  C6   DC B  16       1.713  -2.745  21.318  1.00  0.00
ATOM    330  C2'  DC B  16       3.437  -4.907  20.318  1.00  0.00
ATOM    331  C3'  DC B  16       4.858  -5.157  20.785  1.00  0.00
ATOM    332  O3'  DC B  16       5.108  -6.554  20.902  1.00  0.00
ATOM    333  P    DC B  17       5.520  -7.467  19.623  1.00  0.00
ATOM    334  OP1  DC B  17       6.109  -8.725  20.130  1.00  0.00
ATOM    335  OP2  DC B  17       6.293  -6.624  18.681  1.00  0.00
ATOM    336  O5'  DC B  17       4.120  -7.802  18.908  1.00  0.00
ATOM    337  C5'  DC B  17       3.476  -9.054  19.034  1.00  0.00
ATOM    338  C4'  DC B  17       2.198  -9.114  18.191  1.00  0.00
ATOM    339  O4'  DC B  17       1.330  -8.061  18.604  1.00  0.00
ATOM    340  C1'  DC B  17       0.994  -7.290  17.470  1.00  0.00
ATOM    341  N1   DC B  17       0.465  -5.941  17.763  1.00  0.00
ATOM    342  C2   DC B  17      -0.886  -5.886  18.119  1.00  0.00
ATOM    343  O2   DC B  17      -1.491  -6.957  18.323  1.00  0.00
ATOM    344  N3   DC B  17      -1.468  -4.650  18.264  1.00  0.00
ATOM    345  C4   DC B  17      -0.723  -3.519  18.058  1.00  0.00
ATOM    346  N4   DC B  17      -1.267  -2.322  18.188  1.00  0.00
ATOM    347  C5   DC B  17       0.625  -3.563  17.681  1.00  0.00
ATOM    348  C6   DC B  17       1.186  -4.791  17.534  1.00  0.00
ATOM    349  C2'  DC B  17       2.197  -7.384  16.549  1.00  0.00
ATOM    350  C3'  DC B  17       2.437  -8.885  16.663  1.00  0.00
ATOM    351  O3'  DC B  17       1.568  -9.538  15.722  1.00  0.00
ATOM    352  P    DT B  18       0.404 -10.625  16.069  1.00  0.00
ATOM    353  OP1  DT B  18      -0.418 -10.142  17.202  1.00  0.00
ATOM    354  OP2  DT B  18       1.041 -11.955  16.151  1.00  0.00
ATOM    355  O5'  DT B  18      -0.550 -10.585  14.748  1.00  0.00
ATOM    356  C5'  DT B  18      -1.890 -11.091  14.761  1.00  0.00
ATOM    357  C4'  DT B  18      -3.012 -10.018  14.607  1.00  0.00
ATOM    358  O4'  DT B  18      -2.540  -8.776  15.120  1.00  0.00
ATOM    359  C1'  DT B  18      -2.889  -7.786  14.194  1.00  0.00
ATOM    360  N1   DT B  18      -2.180  -6.499  14.286  1.00  0.00
ATOM    361  C2   DT B  18      -2.987  -5.425  14.623  1.00  0.00
ATOM    362  O2   DT B  18      -4.185  -5.515  14.907  1.00  0.00
ATOM    363  N3   DT B  18      -2.390  -4.185  14.643  1.00  0.00
ATOM    364  C4   DT B  18      -1.061  -3.917  14.354  1.00  0.00
ATOM    365  O4   DT B  18      -0.644  -2.748  14.447  1.00  0.00
ATOM    366  C5   DT B  18      -0.267  -5.056  13.996  1.00  0.00
ATOM    367  C7   DT B  18       1.184  -4.959  13.649  1.00  0.00
ATOM    368  C6   DT B  18      -0.848  -6.304  13.972  1.00  0.00
ATOM    369  C2'  DT B  18      -2.808  -8.423  12.829  1.00  0.00
ATOM    370  C3'  DT B  18      -3.504  -9.731  13.144  1.00  0.00
ATOM    371  O3'  DT B  18      -4.939  -9.784  12.916  1.00  0.00
ATOM    372  P    DC B  19      -6.121  -8.658  13.226  1.00  0.00
ATOM    373  OP1  DC B  19      -6.102  -8.358  14.674  1.00  0.00
ATOM    374  OP2  DC B  19      -7.374  -9.177  12.635  1.00  0.00
ATOM    375  O5'  DC B  19      -5.741  -7.273  12.451  1.00  0.00
ATOM    376  C5'  DC B  19      -6.307  -6.892  11.200  1.00  0.00
ATOM    377  C4'  DC B  19      -7.523  -5.921  11.310  1.00  0.00
ATOM    378  O4'  DC B  19      -7.378  -4.896  12.290  1.00  0.00
ATOM    379  C1'  DC B  19      -7.612  -3.591  11.758  1.00  0.00
ATOM    380  N1   DC B  19      -6.335  -2.835  11.718  1.00  0.00
ATOM    381  C2   DC B  19      -6.275  -1.505  12.174  1.00  0.00
ATOM    382  O2   DC B  19      -7.305  -0.877  12.483  1.00  0.00
ATOM    383  N3   DC B  19      -5.046  -0.939  12.273  1.00  0.00
ATOM    384  C4   DC B  19      -3.929  -1.624  11.932  1.00  0.00
ATOM    385  N4   DC B  19      -2.779  -0.968  12.072  1.00  0.00
ATOM    386  C5   DC B  19      -3.959  -2.954  11.436  1.00  0.00
ATOM    387  C6   DC B  19      -5.192  -3.515  11.331  1.00  0.00
ATOM    388  C2'  DC B  19      -8.263  -3.787  10.415  1.00  0.00
ATOM    389  C3'  DC B  19      -7.773  -5.162   9.990  1.00  0.00
ATOM    390  O3'  DC B  19      -8.580  -5.822   9.017  1.00  0.00
ATOM    391  P    DC B  20     -10.196  -5.998   9.112  1.00  0.00
ATOM    392  OP1  DC B  20     -10.560  -6.421  10.478  1.00  0.00
ATOM    393  OP2  DC B  20     -10.603  -6.840   7.961  1.00  0.00
ATOM    394  O5'  DC B  20     -10.819  -4.510   8.880  1.00  0.00
ATOM    395  C5'  DC B  20     -10.652  -3.751   7.684  1.00  0.00
ATOM    396  C4'  DC B  20     -10.884  -2.238   7.954  1.00  0.00
ATOM    397  O4'  DC B  20      -9.767  -1.748   8.689  1.00  0.00
ATOM    398  C1'  DC B  20      -9.146  -0.692   7.987  1.00  0.00
ATOM    399  N1   DC B  20      -7.676  -0.636   8.177  1.00  0.00
ATOM    400  C2   DC B  20      -7.113   0.528   8.710  1.00  0.00
ATOM    401  O2   DC B  20      -7.875   1.450   9.066  1.00  0.00
ATOM    402  N3   DC B  20      -5.750   0.575   8.863  1.00  0.00
ATOM    403  C4   DC B  20      -4.987  -0.499   8.495  1.00  0.00
ATOM    404  N4   DC B  20      -3.673  -0.470   8.632  1.00  0.00
ATOM    405  C5   DC B  20      -5.538  -1.659   7.934  1.00  0.00
ATOM    406  C6   DC B  20      -6.885  -1.689   7.782  1.00  0.00
ATOM    407  C2'  DC B  20      -9.521  -0.943   6.529  1.00  0.00
ATOM    408  C3'  DC B  20     -10.971  -1.331   6.696  1.00  0.00
ATOM    409  O3'  DC B  20     -11.777  -0.173   6.939  1.00  0.00
ATOM    410  P    DT B  21     -12.172   0.924   5.792  1.00  0.00
ATOM    411  OP1  DT B  21     -13.436   1.552   6.230  1.00  0.00
ATOM    412  OP2  DT B  21     -12.133   0.251   4.470  1.00  0.00
ATOM    413  O5'  DT B  21     -11.014   2.083   5.791  1.00  0.00
ATOM    414  C5'  DT B  21     -11.261   3.426   6.235  1.00  0.00
ATOM    415  C4'  DT B  21     -10.074   4.426   6.056  1.00  0.00
ATOM    416  O4'  DT B  21      -8.900   3.704   6.373  1.00  0.00
ATOM    417  C1'  DT B  21      -8.099   3.663   5.225  1.00  0.00
ATOM    418  N1   DT B  21      -7.189   2.523   5.146  1.00  0.00
ATOM    419  C2   DT B  21      -5.892   2.807   5.533  1.00  0.00
ATOM    420  O2   DT B  21      -5.520   3.894   5.986  1.00  0.00
ATOM    421  N3   DT B  21      -4.969   1.794   5.395  1.00  0.00
ATOM    422  C4   DT B  21      -5.226   0.522   4.912  1.00  0.00
ATOM    423  O4   DT B  21      -4.306  -0.312   4.874  1.00  0.00
ATOM    424  C5   DT B  21      -6.582   0.278   4.507  1.00  0.00
ATOM    425  C7   DT B  21      -7.042  -1.032   3.953  1.00  0.00
ATOM    426  C6   DT B  21      -7.517   1.282   4.635  1.00  0.00
ATOM    427  C2'  DT B  21      -8.982   3.870   4.028  1.00  0.00
ATOM    428  C3'  DT B  21      -9.841   4.970   4.602  1.00  0.00
ATOM    429  O3'  DT B  21      -9.267   6.293   4.391  1.00  0.00
ATOM    430  P    DC B  22      -8.003   7.058   5.164  1.00  0.00
ATOM    431  OP1  DC B  22      -7.939   6.568   6.554  1.00  0.00
ATOM    432  OP2  DC B  22      -8.188   8.508   4.936  1.00  0.00
ATOM    433  O5'  DC B  22      -6.579   6.612   4.436  1.00  0.00
ATOM    434  C5'  DC B  22      -5.890   7.370   3.418  1.00  0.00
ATOM    435  C4'  DC B  22      -4.473   7.930   3.817  1.00  0.00
ATOM    436  O4'  DC B  22      -3.559   6.883   4.160  1.00  0.00
ATOM    437  C1'  DC B  22      -2.476   6.784   3.221  1.00  0.00
ATOM    438  N1   DC B  22      -2.227   5.343   2.973  1.00  0.00
ATOM    439  C2   DC B  22      -1.017   4.721   3.347  1.00  0.00
ATOM    440  O2   DC B  22      -0.047   5.380   3.761  1.00  0.00
ATOM    441  N3   DC B  22      -0.960   3.369   3.237  1.00  0.00
ATOM    442  C4   DC B  22      -2.018   2.657   2.783  1.00  0.00
ATOM    443  N4   DC B  22      -1.848   1.337   2.713  1.00  0.00
ATOM    444  C5   DC B  22      -3.238   3.258   2.375  1.00  0.00
ATOM    445  C6   DC B  22      -3.289   4.610   2.477  1.00  0.00
ATOM    446  C2'  DC B  22      -2.973   7.554   2.005  1.00  0.00
ATOM    447  C3'  DC B  22      -3.732   8.693   2.681  1.00  0.00
ATOM    448  O3'  DC B  22      -2.881   9.685   3.265  1.00  0.00
ATOM    449  P    DC B  23      -1.716  10.498   2.472  1.00  0.00
ATOM    450  OP1  DC B  23      -1.325  11.647   3.313  1.00  0.00
ATOM    451  OP2  DC B  23      -2.164  10.727   1.080  1.00  0.00
ATOM    452  O5'  DC B  23      -0.493   9.439   2.458  1.00  0.00
ATOM    453  C5'  DC B  23       0.862   9.839   2.314  1.00  0.00
ATOM    454  C4'  DC B  23       1.467   9.395   0.975  1.00  0.00
ATOM    455  O4'  DC B  23       1.365   7.990   0.848  1.00  0.00
ATOM    456  C1'  DC B  23       0.864   7.665  -0.428  1.00  0.00
ATOM    457  N1   DC B  23       0.317   6.286  -0.441  1.00  0.00
ATOM    458  C2   DC B  23       1.181   5.252  -0.068  1.00  0.00
ATOM    459  O2   DC B  23       2.323   5.549   0.330  1.00  0.00
ATOM    460  N3   DC B  23       0.706   3.965  -0.105  1.00  0.00
ATOM    461  C4   DC B  23      -0.577   3.725  -0.520  1.00  0.00
ATOM    462  N4   DC B  23      -1.048   2.492  -0.573  1.00  0.00
ATOM    463  C5   DC B  23      -1.441   4.749  -0.922  1.00  0.00
ATOM    464  C6   DC B  23      -0.958   6.017  -0.881  1.00  0.00
ATOM    465  C2'  DC B  23      -0.110   8.804  -0.699  1.00  0.00
ATOM    466  C3'  DC B  23       0.737   9.995  -0.259  1.00  0.00
ATOM    467  O3'  DC B  23       1.515  10.394  -1.388  1.00  0.00
ATOM    468  P    DT B  24       3.047  10.913  -1.367  1.00  0.00
ATOM    469  OP1  DT B  24       3.361  11.542  -0.062  1.00  0.00
ATOM    470  OP2  DT B  24       3.249  11.689  -2.611  1.00  0.00
ATOM    471  O5'  DT B  24       3.849   9.498  -1.490  1.00  0.00
ATOM    472  C5'  DT B  24       4.371   9.042  -2.735  1.00  0.00
ATOM    473  C4'  DT B  24       5.179   7.735  -2.602  1.00  0.00
ATOM    474  O4'  DT B  24       4.311   6.632  -2.364  1.00  0.00
ATOM    475  C1'  DT B  24       4.399   5.681  -3.410  1.00  0.00
ATOM    476  N1   DT B  24       3.056   5.123  -3.687  1.00  0.00
ATOM    477  C2   DT B  24       2.827   3.766  -3.505  1.00  0.00
ATOM    478  O2   DT B  24       3.691   2.951  -3.173  1.00  0.00
ATOM    479  N3   DT B  24       1.539   3.324  -3.719  1.00  0.00
ATOM    480  C4   DT B  24       0.459   4.109  -4.087  1.00  0.00
ATOM    481  O4   DT B  24      -0.663   3.580  -4.203  1.00  0.00
ATOM    482  C5   DT B  24       0.746   5.502  -4.281  1.00  0.00
ATOM    483  C7   DT B  24      -0.291   6.498  -4.688  1.00  0.00
ATOM    484  C6   DT B  24       2.027   5.960  -4.082  1.00  0.00
ATOM    485  C2'  DT B  24       4.970   6.449  -4.600  1.00  0.00
ATOM    486  C3'  DT B  24       5.930   7.392  -3.903  1.00  0.00
ATOM    487  O3'  DT B  24       7.158   6.752  -3.620  1.00  0.00
TER     488       DT B  24 
ATOM    489  O5'  DT C  25     -10.341  -2.605  -3.871  1.00  0.00
ATOM    490  C5'  DT C  25     -10.049  -3.393  -2.735  1.00  0.00
ATOM    491  C4'  DT C  25      -9.258  -4.658  -3.113  1.00  0.00
ATOM    492  O4'  DT C  25      -8.010  -4.294  -3.697  1.00  0.00
ATOM    493  C1'  DT C  25      -6.932  -4.592  -2.821  1.00  0.00
ATOM    494  N1   DT C  25      -5.966  -3.470  -2.821  1.00  0.00
ATOM    495  C2   DT C  25      -4.621  -3.716  -3.111  1.00  0.00
ATOM    496  O2   DT C  25      -4.103  -4.815  -3.346  1.00  0.00
ATOM    497  N3   DT C  25      -3.815  -2.608  -3.146  1.00  0.00
ATOM    498  C4   DT C  25      -4.237  -1.312  -2.935  1.00  0.00
ATOM    499  O4   DT C  25      -3.427  -0.390  -2.989  1.00  0.00
ATOM    500  C5   DT C  25      -5.602  -1.105  -2.646  1.00  0.00
ATOM    501  C7   DT C  25      -6.216   0.239  -2.377  1.00  0.00
ATOM    502  C6   DT C  25      -6.406  -2.190  -2.607  1.00  0.00
ATOM    503  C2'  DT C  25      -7.597  -4.811  -1.475  1.00  0.00
ATOM    504  C3'  DT C  25      -8.888  -5.509  -1.889  1.00  0.00
ATOM    505  O3'  DT C  25      -8.752  -6.857  -2.340  1.00  0.00
ATOM    506  P    DG C  26      -8.050  -8.033  -1.474  1.00  0.00
ATOM    507  OP1  DG C  26      -8.275  -9.309  -2.185  1.00  0.00
ATOM    508  OP2  DG C  26      -8.450  -7.900  -0.060  1.00  0.00
ATOM    509  O5'  DG C  26      -6.499  -7.632  -1.630  1.00  0.00
ATOM    510  C5'  DG C  26      -5.437  -8.545  -1.429  1.00  0.00
ATOM    511  C4'  DG C  26      -4.489  -8.045  -0.333  1.00  0.00
ATOM    512  O4'  DG C  26      -4.168  -6.671  -0.555  1.00  0.00
ATOM    513  C1'  DG C  26      -4.347  -5.983   0.656  1.00  0.00
ATOM    514  N9   DG C  26      -4.415  -4.506   0.580  1.00  0.00
ATOM    515  C8   DG C  26      -5.447  -3.617   0.737  1.00  0.00
ATOM    516  N7   DG C  26      -5.018  -2.366   0.738  1.00  0.00
ATOM    517  C5   DG C  26      -3.651  -2.427   0.571  1.00  0.00
ATOM    518  C6   DG C  26      -2.678  -1.429   0.492  1.00  0.00
ATOM    519  O6   DG C  26      -2.832  -0.199   0.553  1.00  0.00
ATOM    520  N1   DG C  26      -1.395  -1.912   0.354  1.00  0.00
ATOM    521  C2   DG C  26      -1.090  -3.252   0.261  1.00  0.00
ATOM    522  N2   DG C  26       0.191  -3.577   0.145  1.00  0.00
ATOM    523  N3   DG C  26      -2.010  -4.208   0.317  1.00  0.00
ATOM    524  C4   DG C  26      -3.272  -3.760   0.483  1.00  0.00
ATOM    525  C2'  DG C  26      -5.498  -6.684   1.348  1.00  0.00
ATOM    526  C3'  DG C  26      -5.093  -8.132   1.086  1.00  0.00
ATOM    527  O3'  DG C  26      -4.104  -8.551   2.025  1.00  0.00
ATOM    528  P    DG C  27      -4.007 -10.077   2.555  1.00  0.00
ATOM    529  OP1  DG C  27      -3.555 -10.920   1.422  1.00  0.00
ATOM    530  OP2  DG C  27      -5.273 -10.401   3.247  1.00  0.00
ATOM    531  O5'  DG C  27      -2.831  -9.999   3.689  1.00  0.00
ATOM    532  C5'  DG C  27      -1.481 -10.436   3.484  1.00  0.00
ATOM    533  C4'  DG C  27      -0.421  -9.296   3.517  1.00  0.00
ATOM    534  O4'  DG C  27      -1.068  -8.145   2.979  1.00  0.00
ATOM    535  C1'  DG C  27      -0.958  -7.155   3.952  1.00  0.00
ATOM    536  N9   DG C  27      -1.753  -5.918   3.893  1.00  0.00
ATOM    537  C8   DG C  27      -3.077  -5.559   4.029  1.00  0.00
ATOM    538  N7   DG C  27      -3.259  -4.245   3.978  1.00  0.00
ATOM    539  C5   DG C  27      -1.988  -3.739   3.814  1.00  0.00
ATOM    540  C6   DG C  27      -1.573  -2.420   3.721  1.00  0.00
ATOM    541  O6   DG C  27      -2.309  -1.429   3.778  1.00  0.00
ATOM    542  N1   DG C  27      -0.210  -2.304   3.562  1.00  0.00
ATOM    543  C2   DG C  27       0.662  -3.376   3.522  1.00  0.00
ATOM    544  N2   DG C  27       1.953  -3.111   3.391  1.00  0.00
ATOM    545  N3   DG C  27       0.276  -4.635   3.617  1.00  0.00
ATOM    546  C4   DG C  27      -1.052  -4.773   3.765  1.00  0.00
ATOM    547  C2'  DG C  27      -0.924  -7.847   5.291  1.00  0.00
ATOM    548  C3'  DG C  27       0.146  -8.880   4.946  1.00  0.00
ATOM    549  O3'  DG C  27       1.487  -8.291   4.928  1.00  0.00
ATOM    550  P    DT C  28       2.372  -7.986   6.299  1.00  0.00
ATOM    551  OP1  DT C  28       2.970  -9.279   6.689  1.00  0.00
ATOM    552  OP2  DT C  28       1.467  -7.316   7.253  1.00  0.00
ATOM    553  O5'  DT C  28       3.638  -6.937   6.046  1.00  0.00
ATOM    554  C5'  DT C  28       4.541  -6.628   7.134  1.00  0.00
ATOM    555  C4'  DT C  28       5.731  -5.587   6.950  1.00  0.00
ATOM    556  O4'  DT C  28       5.343  -4.314   6.428  1.00  0.00
ATOM    557  C1'  DT C  28       5.277  -3.298   7.441  1.00  0.00
ATOM    558  N1   DT C  28       3.960  -2.661   7.308  1.00  0.00
ATOM    559  C2   DT C  28       3.722  -1.302   7.062  1.00  0.00
ATOM    560  O2   DT C  28       4.561  -0.397   6.999  1.00  0.00
ATOM    561  N3   DT C  28       2.404  -0.969   6.859  1.00  0.00
ATOM    562  C4   DT C  28       1.349  -1.857   6.876  1.00  0.00
ATOM    563  O4   DT C  28       0.207  -1.451   6.675  1.00  0.00
ATOM    564  C5   DT C  28       1.637  -3.213   7.122  1.00  0.00
ATOM    565  C7   DT C  28       0.604  -4.301   7.192  1.00  0.00
ATOM    566  C6   DT C  28       2.922  -3.551   7.325  1.00  0.00
ATOM    567  C2'  DT C  28       5.387  -4.100   8.742  1.00  0.00
ATOM    568  C3'  DT C  28       6.370  -5.173   8.312  1.00  0.00
ATOM    569  O3'  DT C  28       7.683  -4.640   8.119  1.00  0.00
ATOM    570  P    DG C  29       8.574  -4.003   9.323  1.00  0.00
ATOM    571  OP1  DG C  29       9.881  -3.616   8.748  1.00  0.00
ATOM    572  OP2  DG C  29       8.536  -4.951  10.460  1.00  0.00
ATOM    573  O5'  DG C  29       7.800  -2.662   9.800  1.00  0.00
ATOM    574  C5'  DG C  29       8.207  -1.352   9.456  1.00  0.00
ATOM    575  C4'  DG C  29       7.358  -0.308  10.202  1.00  0.00
ATOM    576  O4'  DG C  29       5.984  -0.455   9.847  1.00  0.00
ATOM    577  C1'  DG C  29       5.198  -0.452  11.013  1.00  0.00
ATOM    578  N9   DG C  29       3.843  -1.033  10.834  1.00  0.00
ATOM    579  C8   DG C  29       3.395  -2.328  10.871  1.00  0.00
ATOM    580  N7   DG C  29       2.090  -2.400  10.676  1.00  0.00
ATOM    581  C5   DG C  29       1.650  -1.102  10.522  1.00  0.00
ATOM    582  C6   DG C  29       0.380  -0.571  10.281  1.00  0.00
ATOM    583  O6   DG C  29      -0.695  -1.178  10.162  1.00  0.00
ATOM    584  N1   DG C  29       0.354   0.805  10.229  1.00  0.00
ATOM    585  C2   DG C  29       1.476   1.595  10.348  1.00  0.00
ATOM    586  N2   DG C  29       1.306   2.909  10.284  1.00  0.00
ATOM    587  N3   DG C  29       2.691   1.098  10.541  1.00  0.00
ATOM    588  C4   DG C  29       2.738  -0.246  10.638  1.00  0.00
ATOM    589  C2'  DG C  29       6.079  -1.143  12.039  1.00  0.00
ATOM    590  C3'  DG C  29       7.414  -0.454  11.750  1.00  0.00
ATOM    591  O3'  DG C  29       7.502   0.829  12.371  1.00  0.00
ATOM    592  P    DG C  30       8.178   1.050  13.831  1.00  0.00
ATOM    593  OP1  DG C  30       9.552   0.501  13.794  1.00  0.00
ATOM    594  OP2  DG C  30       7.217   0.555  14.843  1.00  0.00
ATOM    595  O5'  DG C  30       8.286   2.683  13.943  1.00  0.00
ATOM    596  C5'  DG C  30       7.716   3.444  15.019  1.00  0.00
ATOM    597  C4'  DG C  30       6.385   4.155  14.630  1.00  0.00
ATOM    598  O4'  DG C  30       5.661   3.163  13.902  1.00  0.00
ATOM    599  C1'  DG C  30       4.477   2.959  14.582  1.00  0.00
ATOM    600  N9   DG C  30       3.657   1.768  14.344  1.00  0.00
ATOM    601  C8   DG C  30       3.807   0.402  14.423  1.00  0.00
ATOM    602  N7   DG C  30       2.683  -0.256  14.165  1.00  0.00
ATOM    603  C5   DG C  30       1.761   0.740  13.936  1.00  0.00
ATOM    604  C6   DG C  30       0.411   0.635  13.640  1.00  0.00
ATOM    605  O6   DG C  30      -0.221  -0.424  13.548  1.00  0.00
ATOM    606  N1   DG C  30      -0.189   1.862  13.459  1.00  0.00
ATOM    607  C2   DG C  30       0.466   3.074  13.583  1.00  0.00
ATOM    608  N2   DG C  30      -0.248   4.176  13.413  1.00  0.00
ATOM    609  N3   DG C  30       1.750   3.184  13.870  1.00  0.00
ATOM    610  C4   DG C  30       2.360   1.998  14.044  1.00  0.00
ATOM    611  C2'  DG C  30       4.780   3.192  16.038  1.00  0.00
ATOM    612  C3'  DG C  30       5.467   4.541  15.882  1.00  0.00
ATOM    613  O3'  DG C  30       4.471   5.599  15.701  1.00  0.00
ATOM    614  P    DT C  31       3.645   6.274  16.981  1.00  0.00
ATOM    615  OP1  DT C  31       4.530   7.326  17.526  1.00  0.00
ATOM    616  OP2  DT C  31       3.263   5.158  17.880  1.00  0.00
ATOM    617  O5'  DT C  31       2.222   7.031  16.578  1.00  0.00
ATOM    618  C5'  DT C  31       1.446   7.690  17.609  1.00  0.00
ATOM    619  C4'  DT C  31       0.059   8.404  17.294  1.00  0.00
ATOM    620  O4'  DT C  31      -0.884   7.595  16.592  1.00  0.00
ATOM    621  C1'  DT C  31      -1.916   7.084  17.450  1.00  0.00
ATOM    622  N1   DT C  31      -1.972   5.638  17.216  1.00  0.00
ATOM    623  C2   DT C  31      -3.090   4.922  16.765  1.00  0.00
ATOM    624  O2   DT C  31      -4.227   5.362  16.565  1.00  0.00
ATOM    625  N3   DT C  31      -2.866   3.589  16.514  1.00  0.00
ATOM    626  C4   DT C  31      -1.655   2.945  16.657  1.00  0.00
ATOM    627  O4   DT C  31      -1.566   1.748  16.405  1.00  0.00
ATOM    628  C5   DT C  31      -0.559   3.706  17.118  1.00  0.00
ATOM    629  C7   DT C  31       0.818   3.154  17.343  1.00  0.00
ATOM    630  C6   DT C  31      -0.767   5.009  17.376  1.00  0.00
ATOM    631  C2'  DT C  31      -1.396   7.405  18.854  1.00  0.00
ATOM    632  C3'  DT C  31      -0.739   8.746  18.591  1.00  0.00
ATOM    633  O3'  DT C  31      -1.715   9.763  18.351  1.00  0.00
ATOM    634  P    DG C  32      -2.779  10.266  19.480  1.00  0.00
ATOM    635  OP1  DG C  32      -3.561  11.369  18.876  1.00  0.00
ATOM    636  OP2  DG C  32      -2.024  10.513  20.728  1.00  0.00
ATOM    637  O5'  DG C  32      -3.778   9.018  19.757  1.00  0.00
ATOM    638  C5'  DG C  32      -5.137   8.986  19.354  1.00  0.00
ATOM    639  C4'  DG C  32      -5.867   7.753  19.929  1.00  0.00
ATOM    640  O4'  DG C  32      -5.199   6.564  19.504  1.00  0.00
ATOM    641  C1'  DG C  32      -4.980   5.734  20.620  1.00  0.00
ATOM    642  N9   DG C  32      -3.916   4.711  20.457  1.00  0.00
ATOM    643  C8   DG C  32      -2.564   4.783  20.678  1.00  0.00
ATOM    644  N7   DG C  32      -1.975   3.613  20.504  1.00  0.00
ATOM    645  C5   DG C  32      -2.974   2.729  20.154  1.00  0.00
ATOM    646  C6   DG C  32      -2.945   1.369  19.843  1.00  0.00
ATOM    647  O6   DG C  32      -1.965   0.608  19.816  1.00  0.00
ATOM    648  N1   DG C  32      -4.186   0.833  19.573  1.00  0.00
ATOM    649  C2   DG C  32      -5.349   1.569  19.563  1.00  0.00
ATOM    650  N2   DG C  32      -6.478   0.922  19.299  1.00  0.00
ATOM    651  N3   DG C  32      -5.385   2.867  19.839  1.00  0.00
ATOM    652  C4   DG C  32      -4.186   3.410  20.136  1.00  0.00
ATOM    653  C2'  DG C  32      -4.745   6.720  21.752  1.00  0.00
ATOM    654  C3'  DG C  32      -5.878   7.703  21.485  1.00  0.00
ATOM    655  O3'  DG C  32      -7.111   7.192  22.011  1.00  0.00
ATOM    656  P    DG C  33      -8.071   8.047  23.005  1.00  0.00
ATOM    657  OP1  DG C  33      -9.005   8.828  22.168  1.00  0.00
ATOM    658  OP2  DG C  33      -7.215   8.752  23.991  1.00  0.00
ATOM    659  O5'  DG C  33      -8.914   6.907  23.826  1.00  0.00
ATOM    660  C5'  DG C  33     -10.169   6.377  23.377  1.00  0.00
ATOM    661  C4'  DG C  33     -10.181   4.832  23.203  1.00  0.00
ATOM    662  O4'  DG C  33      -8.904   4.506  22.660  1.00  0.00
ATOM    663  C1'  DG C  33      -8.332   3.597  23.543  1.00  0.00
ATOM    664  N9   DG C  33      -6.898   3.286  23.495  1.00  0.00
ATOM    665  C8   DG C  33      -5.717   3.936  23.780  1.00  0.00
ATOM    666  N7   DG C  33      -4.653   3.157  23.626  1.00  0.00
ATOM    667  C5   DG C  33      -5.182   1.944  23.238  1.00  0.00
ATOM    668  C6   DG C  33      -4.532   0.752  22.963  1.00  0.00
ATOM    669  O6   DG C  33      -3.312   0.566  23.030  1.00  0.00
ATOM    670  N1   DG C  33      -5.402  -0.254  22.612  1.00  0.00
ATOM    671  C2   DG C  33      -6.774  -0.109  22.543  1.00  0.00
ATOM    672  N2   DG C  33      -7.488  -1.172  22.207  1.00  0.00
ATOM    673  N3   DG C  33      -7.402   1.021  22.816  1.00  0.00
ATOM    674  C4   DG C  33      -6.573   2.020  23.162  1.00  0.00
ATOM    675  C2'  DG C  33      -8.886   3.890  24.909  1.00  0.00
ATOM    676  C3'  DG C  33     -10.358   3.943  24.505  1.00  0.00
ATOM    677  O3'  DG C  33     -10.906   2.610  24.249  1.00  0.00
ATOM    678  P    DT C  34     -11.326   1.543  25.455  1.00  0.00
ATOM    679  OP1  DT C  34     -12.680   1.937  25.893  1.00  0.00
ATOM    680  OP2  DT C  34     -10.235   1.553  26.449  1.00  0.00
ATOM    681  O5'  DT C  34     -11.440  -0.023  24.916  1.00  0.00
ATOM    682  C5'  DT C  34     -11.880  -1.062  25.820  1.00  0.00
ATOM    683  C4'  DT C  34     -11.979  -2.576  25.345  1.00  0.00
ATOM    684  O4'  DT C  34     -10.791  -3.146  24.786  1.00  0.00
ATOM    685  C1'  DT C  34     -10.099  -4.019  25.706  1.00  0.00
ATOM    686  N1   DT C  34      -8.708  -3.535  25.742  1.00  0.00
ATOM    687  C2   DT C  34      -7.565  -4.277  25.412  1.00  0.00
ATOM    688  O2   DT C  34      -7.510  -5.482  25.148  1.00  0.00
ATOM    689  N3   DT C  34      -6.396  -3.556  25.368  1.00  0.00
ATOM    690  C4   DT C  34      -6.288  -2.203  25.608  1.00  0.00
ATOM    691  O4   DT C  34      -5.190  -1.657  25.533  1.00  0.00
ATOM    692  C5   DT C  34      -7.462  -1.500  25.938  1.00  0.00
ATOM    693  C7   DT C  34      -7.512  -0.033  26.246  1.00  0.00
ATOM    694  C6   DT C  34      -8.611  -2.196  25.989  1.00  0.00
ATOM    695  C2'  DT C  34     -10.827  -3.793  27.030  1.00  0.00
ATOM    696  C3'  DT C  34     -12.240  -3.524  26.543  1.00  0.00
ATOM    697  O3'  DT C  34     -12.852  -4.730  26.100  1.00  0.00
ATOM    698  P    DG C  35     -13.557  -5.771  27.112  1.00  0.00
ATOM    699  OP1  DG C  35     -14.125  -6.865  26.290  1.00  0.00
ATOM    700  OP2  DG C  35     -14.440  -5.000  28.010  1.00  0.00
ATOM    701  O5'  DG C  35     -12.341  -6.361  27.990  1.00  0.00
ATOM    702  C5'  DG C  35     -11.517  -7.423  27.537  1.00  0.00
ATOM    703  C4'  DG C  35     -10.181  -7.501  28.305  1.00  0.00
ATOM    704  O4'  DG C  35      -9.225  -6.515  27.971  1.00  0.00
ATOM    705  C1'  DG C  35      -8.225  -6.494  28.974  1.00  0.00
ATOM    706  N9   DG C  35      -7.583  -5.173  29.081  1.00  0.00
ATOM    707  C8   DG C  35      -8.189  -3.965  29.295  1.00  0.00
ATOM    708  N7   DG C  35      -7.317  -2.974  29.299  1.00  0.00
ATOM    709  C5   DG C  35      -6.081  -3.545  29.087  1.00  0.00
ATOM    710  C6   DG C  35      -4.804  -2.990  28.981  1.00  0.00
ATOM    711  O6   DG C  35      -4.476  -1.797  29.071  1.00  0.00
ATOM    712  N1   DG C  35      -3.805  -3.921  28.802  1.00  0.00
ATOM    713  C2   DG C  35      -4.036  -5.274  28.688  1.00  0.00
ATOM    714  N2   DG C  35      -2.979  -6.059  28.518  1.00  0.00
ATOM    715  N3   DG C  35      -5.249  -5.810  28.760  1.00  0.00
ATOM    716  C4   DG C  35      -6.241  -4.922  28.969  1.00  0.00
ATOM    717  C2'  DG C  35      -8.927  -6.859  30.270  1.00  0.00
ATOM    718  C3'  DG C  35     -10.307  -7.343  29.822  1.00  0.00
ATOM    719  O3'  DG C  35     -10.859  -8.493  30.450  1.00  0.00
ATOM    720  P    DG C  36      -9.988  -9.646  31.174  1.00  0.00
ATOM    721  OP1  DG C  36     -10.812 -10.873  31.231  1.00  0.00
ATOM    722  OP2  DG C  36      -9.450  -9.071  32.428  1.00  0.00
ATOM    723  O5'  DG C  36      -8.754  -9.903  30.164  1.00  0.00
ATOM    724  C5'  DG C  36      -7.894 -11.026  30.250  1.00  0.00
ATOM    725  C4'  DG C  36      -6.669 -10.784  31.155  1.00  0.00
ATOM    726  O4'  DG C  36      -6.109  -9.491  30.993  1.00  0.00
ATOM    727  C1'  DG C  36      -5.568  -9.058  32.228  1.00  0.00
ATOM    728  N9   DG C  36      -5.581  -7.582  32.294  1.00  0.00
ATOM    729  C8   DG C  36      -6.653  -6.742  32.481  1.00  0.00
ATOM    730  N7   DG C  36      -6.323  -5.461  32.454  1.00  0.00
ATOM    731  C5   DG C  36      -4.960  -5.473  32.253  1.00  0.00
ATOM    732  C6   DG C  36      -4.077  -4.410  32.165  1.00  0.00
ATOM    733  O6   DG C  36      -4.384  -3.213  32.272  1.00  0.00
ATOM    734  N1   DG C  36      -2.777  -4.816  31.972  1.00  0.00
ATOM    735  C2   DG C  36      -2.380  -6.138  31.878  1.00  0.00
ATOM    736  N2   DG C  36      -1.090  -6.380  31.709  1.00  0.00
ATOM    737  N3   DG C  36      -3.215  -7.160  31.970  1.00  0.00
ATOM    738  C4   DG C  36      -4.490  -6.789  32.170  1.00  0.00
ATOM    739  C2'  DG C  36      -6.429  -9.700  33.308  1.00  0.00
ATOM    740  C3'  DG C  36      -6.903 -10.998  32.663  1.00  0.00
ATOM    741  O3'  DG C  36      -6.132 -12.089  33.124  1.00  0.00
TER     742       DG C  36 
END   
